# Supplementary material for: Oct4 is required for lineage priming in the developing inner cell mass of the mouse blastocyst
Source: PubMed Central journal article supplement — Development. 2014 Mar 1;141(5):1001–10. doi: 10.1242/dev.096875 (PMC3929414; doi:10.1242/dev.096875), 2014-03-01
Supplement: supp_141.5.1001_DEV096875.pdf [file supp_141.5.1001_DEV096875.pdf]

## Supplementary Fig. 1A

Nanog

| Het-TE   | ODE-TE   | Het-ICM-L | ODE-ICM-L |
|----------|----------|-----------|-----------|
| 0.363194 | 1.082075 | 0.685532  | 0.577389  |
| 0.374026 | 1.154777 | 0.602411  | 0.434131  |
| 0.393562 | 0.771611 | 0.512466  | 0.39672   |
| 0.282279 | 2.585896 | 0.740673  | 0.353926  |
| 0.22439  | 4.89E-01 | 0.398599  | 0.870564  |
| 0.536897 | 0.669427 | 0.383421  | 0.328694  |
| 0.485805 | 1.724249 | 0.366824  | 0.287812  |
| 0.18843  | 0.742129 | 0.79909   | 0.12849   |
| 0.644631 | 0.466561 | 0.429263  | 0.626797  |
| 0.498863 | 0.264804 | 0.624977  | 0.782029  |
| 0.301206 | 3.104732 | 0.741128  | 0.298007  |
| 0.380205 | 0.745405 | 0.376943  | 0.638308  |
| 0.388412 | 0.79859  | 0.819973  | 0.865105  |
| 0.431146 | 0.500546 | 0.77202   | 0.377611  |
| 0.407957 | 0.952366 | 0.618471  | 0.759873  |
| 0.574659 | 1.10E+00 | 0.812329  | 0.751865  |
| 0.392234 | 0.32939  | 0.768289  | 0.490992  |
| 1.492539 | 2.065605 | 0.611101  | 0.464149  |
| 0.481483 | 0.357157 | 0.626251  | 0.797998  |
| 0.460646 | 0.457234 | 0.544495  | 0.303753  |
| 0.400901 | 1.172884 | 0.729072  | 0.687079  |
| 0.521065 | 1.515378 | 0.588126  | 0.725205  |
| 0.748863 | 2.935942 | 0.448116  | 0.272607  |
| 0.426215 | 0.967106 | 0.608872  | 0.834713  |
| 0.439459 | 0.732848 | 0.415177  | 0.888763  |
| 0.347229 | 1.092857 | 0.381583  | 0.401756  |
| 0.403003 | 1.097907 | 0.609736  | 0.548544  |
| 0.345364 | 2.758417 | 0.216146  | 1.788854  |
| 1.061374 | 4.88808  | 0.46242   | 2.11283   |
| 0.480073 | 2.270337 | 0.860191  | 2.305187  |
| 0.472839 | 0.323685 | 0.334327  | 2.112739  |
| 0.618471 | 1.241538 | 0.415328  | 2.058826  |
| 0.381456 | 0.569199 | 0.525569  | 5.839854  |
| 0.523885 | 1.543358 | 0.606733  | 5.834395  |
| 0.511783 | 0.256374 | 0.259754  | 1.593767  |
| 0.199377 | 0.236146 | 0.700546  | 3.909418  |
| 1.083803 | 2.915696 | 0.803822  | 2.799864  |
| 0.415446 | 0.610009 | 0.464786  | 4.083394  |
| 0.456142 | 1.664513 | 0.694904  | 3.82889   |
| 3.278298 | 0.700182 | 0.865605  | 3.21465   |
| 0.685714 | 0.54172  | 0.30172   | 4.268608  |
| 0.852184 | 1.297771 | 0.207743  | 5.139217  |
| 0.337743 | 1.541902 | 0.727116  | 3.888217  |
| 0.404827 | 1.861237 | 0.521201  | 3.03253   |
| 0.594813 | 0.776752 | 0.531893  | 2.605096  |
| 0.538444 | 2.426888 | 0.615105  | 3.679618  |
| 0.414181 | 0.367079 | 0.608917  | 4.40141   |

# Supplementary Fig. 1B

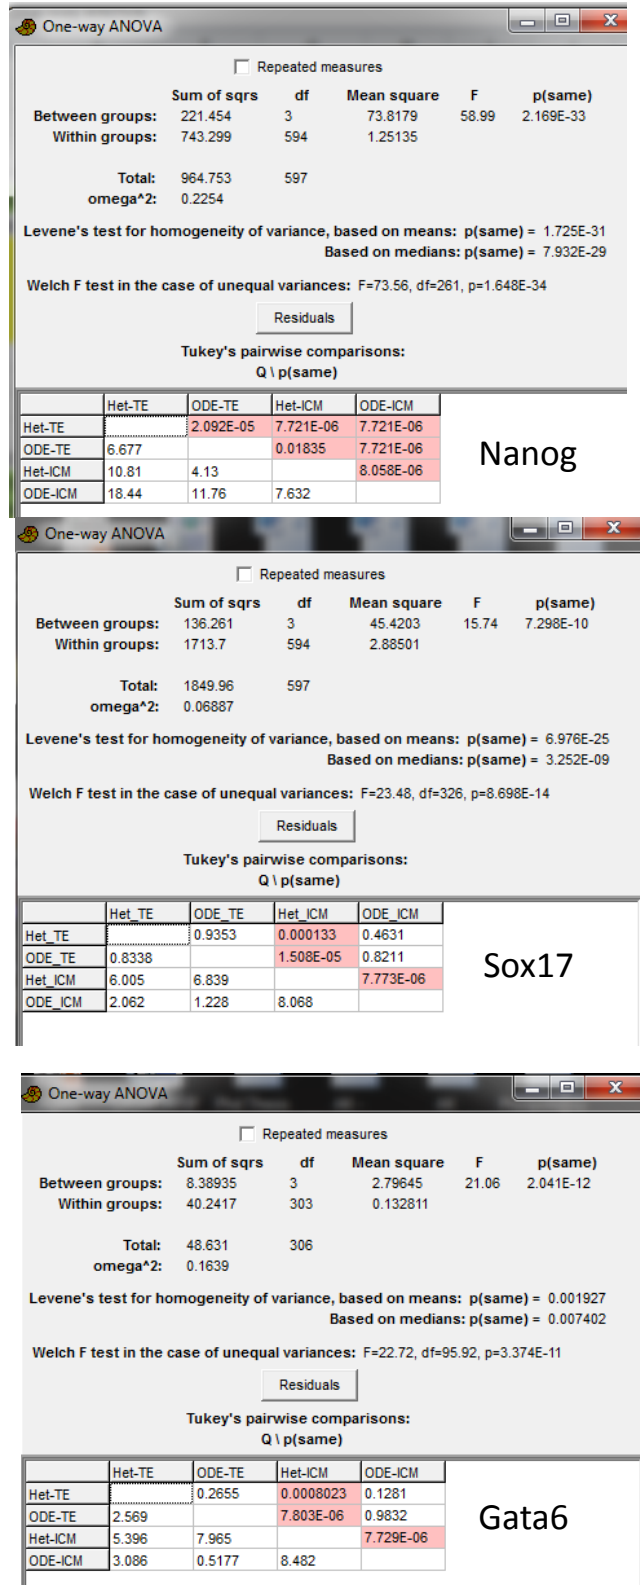

**Fig. S1. QIF data used to generate plots presented in Fig. 1G-I.** (A) Raw data. (B) ANOVA analysis. Each set of values represents the population of cells measured for immunofluorescence of the marker (Nanog, Gata6 or Sox17). Het refers to heterozygous embryos generated from crosses between ODE females and *Oct4* heterozygous males; ODE refers to the null embryos from this cross (see Fig. 1C).
